# Supplementary material for: An Overview of Nano Multilayers as Model Systems for Developing Nanoscale Microstructures
Source: MDPI journal article supplement (doi:10.3390/ma15010382), 2022-01-05
Supplement: s1 [file s1]

# Supplementary Materials: An Overview of Nano Multilayers as Model Systems for Developing Nanoscale Microstructures

Chelsea D. Appleget <sup>1</sup>, Juan Sebastian Riano <sup>2</sup> and Andrea M. Hodge <sup>1,2,\*</sup>

<sup>1</sup> Department of Aerospace and Mechanical Engineering, University of Southern California, Los Angeles, CA 90089, USA; capplege@usc.edu

<sup>2</sup> Mork Family Department of Chemical Engineering and Materials Science, University of Southern California, Los Angeles, CA 90089, USA; rianozam@usc.edu

\* Correspondence: ahodge@usc.edu; Tel.: +1-213-740-4225

**Table S1.** Supplementary data for Figure 6 summarizing geometry parameters, surface energy parameters, and experimentally observed layer breakdown temperatures. All referenced data sets are nonequiatomic binary NMM structures with experimentally observed microstructural transformations under heat treatment.

| System     | Alternating Layer Structure | Lattice Mismatch (%) | Geometry Parameter ( $r = b/a$ ) | Surface Energy Mismatch | Layer Breakdown Temp (°C) | Norm. Average layer Breakdown Temp |
|------------|-----------------------------|----------------------|----------------------------------|-------------------------|---------------------------|------------------------------------|
| Mo-Au [1]  | BCC/FCC                     | −22.58               | 0.95                             | 0.56                    | 550                       | 0.24                               |
| W-Cr [2]   | BCC/BCC                     | −13.15               | 1.10                             | 0.51                    | 1000                      | 0.34                               |
| Hf-Ti [3]  | HCP/FCC                     | 7.68                 | 1.53                             | 0.02                    | 800                       | 0.38                               |
| Ta-Hf [4]  | BCC/HCP                     | 3.40                 | 0.96                             | 0.22                    | 1000                      | 0.35                               |
| Ti-Ni [5]  | FCC/FCC                     | 18.10                | 1.18                             | 0.15                    | 600                       | 0.38                               |
| W-Cu [6]   | BCC/FCC                     | −14.01               | 1.07                             | 0.57                    | 800                       | 0.28                               |
| Cu-W [6]   | FCC/BCC                     | 12.29                | 0.93                             | 0.57                    | 700                       | 0.43                               |
| Nb-Al [7]  | BCC/FCC                     | −22.59               | 0.78                             | 0.93                    | 600                       | 0.29                               |
| Mo-Cu [8]  | BCC/FCC                     | −14.30               | 1.07                             | 0.39                    | 800                       | 0.32                               |
| Cu-Mo [8]  | FCC/BCC                     | 12.51                | 0.94                             | 0.39                    | 725                       | 0.46                               |
| Cu-Nb [9]  | FCC/BCC                     | 8.25                 | 0.89                             | 0.43                    | 607                       | 0.45                               |
| Ta-Cu [10] | BCC/FCC                     | −8.81                | 1.12                             | 0.44                    | 700                       | 0.29                               |
| Cu-Ta [11] | FCC/BCC                     | 8.10                 | 0.89                             | 0.44                    | 800                       | 0.43                               |

## References

1. Bahena, J.A.; Riano, J.S.; Chellali, M.R.; Boll, T.; Hodge, A.M. Thermally activated microstructural evolution of sputtered nanostructured Mo–Au. *Materialia* **2018**, *4*, 157–165.
2. Riano, J.S.; Hodge, A.M. Phase transformations in the W–Cr system at the nanoscale. *Materialia* **2018**, *2*, 190–195.
3. Riano, J.S.; Hodge, A.M. Exploring the microstructural evolution of Hf–Ti: From nanometallic multilayers to nanostructures. *Scr. Mater.* **2018**, *142*, 55–60.
4. Riano, J.S.; Hodge, A.M. Exploring the thermal stability of a bimodal nanoscale multilayered system. *Scr. Mater.* **2019**, *166*, 19–23.
5. Shi, J.; Cao, Z.; Liu, Y.; Zhao, Z. Size dependent alloying and plastic deformation behaviors of Ti/Ni nano-multilayers. *J. Alloys Compd.* **2017**, *727*, 691–695.
6. Druzhinin, A.; Ariosa, D.; Siol, S.; Ott, N.; Straumal, B.; Janczak-Rusch, J.; Jeurgens, L.; Cancellieri, C. Effect of the individual layer thickness on the transformation of Cu/W nano-multilayers into nanocomposites. *Materialia* **2019**, *7*, 100400.
7. Im, Y.; Johnson, P.; McKnelly Jr, L.; Morris Jr, J. Nb3Al formation in sputter-deposited Nb/Al multilayer samples. *Journal of the Less Common Metals* **1988**, *139*, 87–95.
8. Srinivasan, D.; Sanyal, S.; Corderman, R.; Subramanian, P. Thermally stable nanomultilayer films of Cu/Mo. *Metall. Mater. Trans. A* **2006**, *37*, 995–1003.
9. Troche, P.; Hoffmann, J.; Heinemann, K.; Hartung, F.; Schmitz, G.; Freyhardt, H.C.; Rudolph, D.; Thieme, J.; Guttman, P. Thermally driven shape instabilities of Nb/Cu multilayer structures: Instability of Nb/Cu multilayers. *Thin Solid Films* **1999**, *353*, 33–39.
10. Zhang, Y.; Fu, L.; Zhu, J.; Yang, W.; Li, D.; Zhou, L. Thermal stability of co-sputtered TaCu amorphous nano-multilayers. *Thin Solid Films* **2021**, 138766.
11. Lee, H.-J.; Kwon, K.-W.; Ryu, C.; Sinclair, R. Thermal stability of a Cu/Ta multilayer: An intriguing interfacial reaction. *Acta Mater.* **1999**, *47*, 3965–3975.
